# Supplementary material
Source: MDPI journal article supplement (https://www.mdpi.com/2077-0472/12/5/711)
Supplement: s1 [file s1]

### Hall & Anderson (2022) Supplemental SEM Cu Data

| Study                      | Region             | Site Type                  | Sites                                   | Sub-sites | SEM Cu ug/g | Means  |
|----------------------------|--------------------|----------------------------|-----------------------------------------|-----------|-------------|--------|
| Alves et al (2007)         | SE Coast of Brazil | Urban                      | Core 1                                  | 1A        | 22.60       | 32.56  |
|                            |                    |                            |                                         | 1B        | 34.10       |        |
|                            |                    |                            |                                         | 1C        | 29.60       |        |
|                            |                    |                            |                                         | 1D        | 40.00       |        |
|                            |                    |                            |                                         | 1E        | 36.50       |        |
|                            |                    |                            | Core 8                                  | 8A        | 27.40       | 25.66  |
|                            |                    |                            |                                         | 8B        | 30.30       |        |
|                            |                    |                            |                                         | 8C        | 20.90       |        |
|                            |                    |                            |                                         | 8D        | 15.60       |        |
|                            |                    |                            |                                         | 8E        | 22.30       |        |
|                            |                    |                            |                                         | 8F        | 31.10       |        |
|                            |                    |                            |                                         | 8G        | 34.20       |        |
|                            |                    |                            |                                         | 8H        | 23.50       |        |
|                            |                    |                            | Core 19                                 | 19A       | 13.60       | 16.33  |
|                            |                    |                            |                                         | 19B       | 13.30       |        |
|                            |                    |                            |                                         | 19C       | 13.60       |        |
|                            |                    |                            |                                         | 19D       | 21.50       |        |
|                            |                    |                            |                                         | 19E       | 10.50       |        |
|                            |                    |                            |                                         | 19F       | 14.30       |        |
|                            |                    |                            |                                         | 19G       | 19.90       |        |
|                            |                    |                            |                                         | 19H       | 23.90       |        |
| Ankley et al 1993          | Washington State   | Urban-residential          | Steilacoom Lake                         | SL1       | 56.56       | 107.90 |
|                            |                    |                            |                                         | SL2       | 193.82      |        |
|                            |                    |                            |                                         | SL3       | 122.64      |        |
|                            |                    |                            |                                         | SL4       | 180.47      |        |
|                            |                    |                            |                                         | SL5       | 79.43       |        |
|                            |                    |                            |                                         | SL6       | 38.13       |        |
|                            |                    |                            |                                         | SL7       | 41.94       |        |
|                            |                    |                            |                                         | SL8       | 84.52       |        |
|                            |                    |                            |                                         | SL9       | 123.91      |        |
|                            |                    |                            |                                         | SL10      | 80.70       |        |
|                            |                    |                            |                                         | SL11      | 184.28      |        |
| Besser et al (1996)        | Western Montana    | Reference                  | Upper Clark Fork R & Milltown Reservoir | RC (ref.) | 1.91        | 1.91   |
|                            |                    |                            |                                         | MR19      | 46.39       | 264.99 |
|                            |                    | Forest w/historical mining |                                         | MR7       | 76.26       | 654.52 |
|                            |                    |                            |                                         | MR2       | 34.95       |        |
|                            |                    |                            |                                         | MR10      | 902.35      |        |
|                            |                    |                            |                                         | CF1       | 654.52      |        |
| Forest w/historical mining | CF4                | 36.22                      | 36.22                                   |           |             |        |
|                            | Agr                |                            |                                         |           |             |        |
| Burton et al (2007)        | Europe             | Agr                        | Europe                                  | Sweden    | 2.29        | 4.85   |
|                            |                    |                            |                                         | Sweden    | 3.37        |        |

| Study               | Region | Site Type | Sites  | Sub-sites     | SEM Cu ug/g | Means |
|---------------------|--------|-----------|--------|---------------|-------------|-------|
| Burton et al (2007) | Europe | Agr       | Europe | Sweden        | 8.90        | 5.28  |
|                     |        |           |        | Denmark       | 1.84        |       |
|                     |        |           |        | Denmark       | 2.61        |       |
|                     |        |           |        | Denmark       | 4.51        |       |
|                     |        |           |        | Denmark       | 5.21        |       |
|                     |        |           |        | Denmark       | 7.31        |       |
|                     |        |           |        | Denmark       | 10.23       |       |
|                     |        |           |        | England/Wales | 7.12        | 15.37 |
|                     |        |           |        | England/Wales | 7.88        |       |
|                     |        |           |        | England/Wales | 8.83        |       |
|                     |        |           |        | England/Wales | 9.85        |       |
|                     |        |           |        | England/Wales | 10.17       |       |
|                     |        |           |        | England/Wales | 10.99       |       |
|                     |        |           |        | England/Wales | 14.30       |       |
|                     |        |           |        | England/Wales | 14.49       |       |
|                     |        |           |        | England/Wales | 16.52       |       |
|                     |        |           |        | England/Wales | 16.65       |       |
|                     |        |           |        | England/Wales | 17.48       |       |
|                     |        |           |        | England/Wales | 17.54       |       |
|                     |        |           |        | England/Wales | 19.83       |       |
|                     |        |           |        | England/Wales | 22.75       |       |
|                     |        |           |        | England/Wales | 25.61       |       |
|                     |        |           |        | England/Wales | 25.86       |       |
|                     |        |           |        | Finland       | 1.21        | 12.98 |
|                     |        |           |        | Finland       | 1.78        |       |
|                     |        |           |        | Finland       | 2.80        |       |
|                     |        |           |        | Finland       | 17.60       |       |
|                     |        |           |        | Finland       | 41.50       |       |
|                     |        |           |        | Belgium       | 3.50        | 11.23 |
|                     |        |           |        | Belgium       | 4.19        |       |
|                     |        |           |        | Belgium       | 10.74       |       |
|                     |        |           |        | Belgium       | 12.84       |       |
|                     |        |           |        | Belgium       | 13.41       |       |
|                     |        |           |        | Belgium       | 22.69       | 8.23  |
|                     |        |           |        | France        | 0.06        |       |
|                     |        |           |        | France        | 0.25        |       |
|                     |        |           |        | France        | 0.51        |       |
|                     |        |           |        | France        | 1.84        |       |
|                     |        |           |        | France        | 5.08        |       |
|                     |        |           |        | France        | 7.05        |       |
|                     |        |           |        | France        | 9.09        |       |
|                     |        |           |        | France        | 9.21        |       |
|                     |        |           |        | France        | 13.47       |       |

| Study                | Region   | Site Type | Sites             | Sub-sites | SEM Cu ug/g | Means |
|----------------------|----------|-----------|-------------------|-----------|-------------|-------|
| Burton et al (2007)  | Europe   | Agr       | Europe            | France    | 15.19       | 15.77 |
|                      |          |           |                   | France    | 16.27       |       |
|                      |          |           |                   | France    | 20.78       |       |
|                      |          |           |                   | Germany   | 1.97        |       |
|                      |          |           |                   | Germany   | 4.58        |       |
|                      |          |           |                   | Germany   | 6.16        |       |
|                      |          |           |                   | Germany   | 6.74        |       |
|                      |          |           |                   | Germany   | 7.05        |       |
|                      |          |           |                   | Germany   | 8.07        |       |
|                      |          |           |                   | Germany   | 13.92       |       |
|                      |          |           |                   | Germany   | 17.35       |       |
|                      |          |           |                   | Germany   | 76.13       |       |
|                      |          |           |                   | Italy     | 3.05        |       |
|                      |          |           |                   | Italy     | 3.56        | 3.30  |
| Campana et al (2009) | SW Spain | Harbor    | Guadalete Estuary | G1        | 4.45        | 46.39 |
|                      |          |           |                   |           | 6.99        |       |
|                      |          |           |                   |           | 13.98       |       |
|                      |          |           |                   |           | 15.89       |       |
|                      |          |           |                   |           | 66.72       |       |
|                      |          | Agr       |                   | G2        | 170.30      | 14.00 |
|                      |          |           |                   |           | 11.44       |       |
|                      |          |           |                   |           | 12.71       |       |
|                      |          |           |                   |           | 15.25       |       |
|                      |          |           |                   |           | 15.25       |       |
|                      |          | Agr       |                   | G3        | 16.52       |       |
|                      |          |           |                   |           | 16.52       |       |
|                      |          |           |                   |           | 10.80       |       |
|                      |          |           |                   |           | 12.07       |       |
|                      |          |           |                   |           | 12.71       |       |
|                      |          | Agr drain |                   | S1        | 13.98       | 14.45 |
|                      |          |           |                   |           | 14.62       |       |
|                      |          |           |                   |           | 15.89       |       |
|                      |          |           |                   |           | 10.2        |       |
|                      |          |           |                   |           | 13.3        |       |
|                      |          |           |                   | S2        | 14.0        |       |
|                      |          |           |                   |           | 14.6        |       |
|                      |          |           |                   |           | 16.5        |       |
|                      |          |           |                   |           | 13.3        |       |
|                      |          |           |                   |           | 13.3        |       |
|                      |          |           |                   |           | 15.3        |       |
|                      |          |           |                   |           | 16.5        |       |
|                      |          |           |                   |           | 16.5        |       |
|                      |          |           |                   |           | 17.2        |       |

| Study                | Region   | Site Type | Sites                          | Sub-sites | SEM Cu ug/g | Means |
|----------------------|----------|-----------|--------------------------------|-----------|-------------|-------|
| Campana et al (2009) | SW Spain | Agr drain | Guadalete Estuary              | S3        | 6.4         | 9.47  |
|                      |          |           |                                |           | 14.6        |       |
|                      |          |           |                                |           | 15.9        |       |
|                      |          |           |                                |           | 15.9        |       |
|                      |          |           |                                |           | 16.5        |       |
|                      |          |           |                                | S4        | 17.2        |       |
|                      |          |           |                                |           | 5.7         |       |
|                      |          |           |                                |           | 13.3        |       |
|                      |          |           |                                |           | 14.6        |       |
|                      |          |           |                                |           | 14.6        |       |
|                      |          |           |                                | S5        | 15.3        |       |
|                      |          |           |                                |           | 15.3        |       |
|                      |          |           |                                |           | 11.4        |       |
|                      |          |           |                                |           | 14.0        |       |
|                      |          |           |                                |           | 14.6        |       |
|                      |          |           |                                | S6        | 15.3        |       |
|                      |          |           |                                |           | 15.3        |       |
|                      |          |           |                                |           | 17.2        |       |
|                      |          |           |                                |           | 9.5         |       |
|                      |          |           |                                |           | 10.2        |       |
|                      |          |           |                                | S7        | 10.8        |       |
|                      |          |           |                                |           | 15.9        |       |
|                      |          |           |                                |           | 17.8        |       |
|                      |          |           |                                |           | 17.8        |       |
|                      |          |           |                                |           | 13.3        |       |
| Chai et al (2015)    | SE China | Urban     | Fengtanghe & Shenzhenhe Rivers |           | 14.0        |       |
|                      |          |           |                                |           | 14.0        |       |
|                      |          |           |                                |           | 17.2        |       |
|                      |          |           |                                |           | 17.2        |       |
|                      |          |           |                                |           | 21.0        |       |
|                      |          |           |                                |           | 1           | 21.60 |
|                      |          |           |                                |           | 2           | 14.08 |
|                      |          |           |                                |           | 3           | 12.17 |
|                      |          |           |                                |           | 4           | 13.83 |
|                      |          |           |                                |           | 5           | 9.07  |
|                      |          |           |                                |           | 6           | 6.03  |
|                      |          |           |                                |           | 7           | 5.38  |
|                      |          |           |                                |           | 8           | 8.16  |
| 9                    | 12.48    |           |                                |           |             |       |
| 10                   | 12.78    |           |                                |           |             |       |
| 11                   | 20.09    |           |                                |           |             |       |
| 12                   | 2.51     |           |                                |           |             |       |
| 13                   | 3.75     |           |                                |           |             |       |

| Study                | Region    | Site Type | Sites                          | Sub-sites | SEM Cu ug/g | Means |
|----------------------|-----------|-----------|--------------------------------|-----------|-------------|-------|
| Chai et al (2015)    | SE China  | Urban     | Fengtanghe & Shenzhenhe Rivers | 14        | 0.00        |       |
|                      |           |           |                                | 15        | 1.58        |       |
|                      |           |           |                                | 16        | 8.00        |       |
| De Jong et al (2009) | N Belgium | Unknown   | E of Antwerp                   | 12        | 2.29        | 14.60 |
|                      |           |           |                                | 11        | 3.94        |       |
|                      |           |           |                                | 14        | 5.34        |       |
|                      |           |           |                                | 8         | 7.63        |       |
|                      |           |           |                                | 4         | 9.15        |       |
|                      |           |           |                                | 6         | 10.7        |       |
|                      |           |           |                                | 7         | 11.3        |       |
|                      |           |           |                                | 17        | 11.9        |       |
|                      |           |           |                                | 1         | 12.5        |       |
|                      |           |           |                                | 2         | 14.1        |       |
|                      |           |           |                                | 13        | 15.1        |       |
|                      |           |           |                                | 16        | 16.3        |       |
|                      |           |           |                                | 15        | 18.0        |       |
|                      |           |           |                                | 9         | 21.2        |       |
|                      |           |           |                                | 10        | 22.9        |       |
|                      |           |           |                                | 3         | 25.4        |       |
|                      |           |           |                                | 5         | 40.6        |       |
| De Jong et al (2010) | N Belgium | Unknown   | E of Antwerp                   | 24        | 6.15        | 44.26 |
|                      |           |           |                                | 14.00     | 6.41        |       |
|                      |           |           |                                | 9.00      | 8.97        |       |
|                      |           |           |                                | 18.00     | 8.97        |       |
|                      |           |           |                                | 26.00     | 9.48        |       |
|                      |           |           |                                | 12.00     | 9.99        |       |
|                      |           |           |                                | 3.00      | 10.25       |       |
|                      |           |           |                                | 17.00     | 10.25       |       |
|                      |           |           |                                | 5.00      | 11.27       |       |
|                      |           |           |                                | 22.00     | 12.81       |       |
|                      |           |           |                                | 7.00      | 13.07       |       |
|                      |           |           |                                | 2.00      | 13.32       |       |
|                      |           |           |                                | 20.00     | 14.86       |       |
|                      |           |           |                                | 8.00      | 15.12       |       |
|                      |           |           |                                | 21.00     | 15.37       |       |
|                      |           |           |                                | 27.00     | 15.50       |       |
|                      |           |           |                                | 10.00     | 17.04       |       |
|                      |           |           |                                | 1.00      | 19.22       |       |
|                      |           |           |                                | 16.00     | 19.60       |       |
|                      |           |           |                                | 19.00     | 20.11       |       |
|                      |           |           |                                | 13.00     | 21.27       |       |
|                      |           |           |                                | 4.00      | 21.78       |       |
|                      |           |           |                                | 28.00     | 24.60       |       |

| Study                      | Region    | Site Type | Sites        | Sub-sites | SEM Cu ug/g | Means |
|----------------------------|-----------|-----------|--------------|-----------|-------------|-------|
| De Jong et al (2010)       | N Belgium | Unknown   | E of Antwerp | 23.00     | 25.88       |       |
|                            |           |           |              | 11.00     | 53.30       |       |
|                            |           |           |              | 15.00     | 54.07       |       |
|                            |           |           |              | 25.00     | 68.93       |       |
|                            |           |           |              | 6.00      | 711.72      |       |
| EU Copper Institute (2008) | N Belgium | Unknown   | Alveringem   | YZ002     | 6.990       | 8.65  |
|                            |           |           | Alveringem   | YZ003     | 3.177       |       |
|                            |           |           | Balen        | REFGN     | 5.719       |       |
|                            |           |           | Beersel      | REFKA     | 15.89       |       |
|                            |           |           | Bree         | DO028     | 2.542       |       |
|                            |           |           | Diksmuide    | YZ011     | 1.271       |       |
|                            |           |           | Diksmuide    | YZ012     | 0.635       |       |
|                            |           |           | Diksmuide    | YZ013     | 0.635       |       |
|                            |           |           | Diksmuide    | YZ014     | 0.635       |       |
|                            |           |           | Diksmuide    | YZ015     | 0.635       |       |
|                            |           |           | Diksmuide    | YZ016     | 1.271       |       |
|                            |           |           | Diksmuide    | YZ017     | 0.635       |       |
|                            |           |           | Diksmuide    | YZ018     | 0.635       |       |
|                            |           |           | Lommel       | DO006     | 0.635       |       |
|                            |           |           | Lo-Reninge   | REFBE     | 1.906       |       |
|                            |           |           | Lo-Reninge   | YZ005     | 4.448       |       |
|                            |           |           | Lo-Reninge   | YZ006     | 5.084       |       |
|                            |           |           | Lo-Reninge   | YZ007     | 3.813       |       |
|                            |           |           | Lo-Reninge   | YZ008     | 4.448       |       |
|                            |           |           | Lo-Reninge   | YZ009     | 1.271       |       |
|                            |           |           | Lo-Reninge   | YZ010     | 8.896       |       |
|                            |           |           | Mol          | SN1-S     | 3.177       |       |
|                            |           |           | Mol          | SN2-S     | 3.177       |       |
|                            |           |           | Mol          | SN3-S     | 5.084       |       |
|                            |           |           | Mol          | SN4-S     | 0.635       |       |
|                            |           |           | Neerpelt     | DO001     | 12.07       |       |
|                            |           |           | Neerpelt     | DO002     | 5.719       |       |
|                            |           |           | Neerpelt     | DO003     | 6.990       |       |
|                            |           |           | Neerpelt     | DO004     | 8.261       |       |
|                            |           |           | Neerpelt     | DO005     | 8.261       |       |
|                            |           |           | Neerpelt     | DO010     | 3.813       |       |
|                            |           |           | Nieuwpoort   | YZ019     | 1.271       |       |
|                            |           |           | Nieuwpoort   | YZ020     | 2.542       |       |
|                            |           |           | Overpelt     | DO008     | 5.084       |       |
|                            |           |           | Overpelt     | DO012     | 5.719       |       |
|                            |           |           | Overpelt     | DO014     | 6.990       |       |
|                            |           |           | Overpelt     | DO015     | 4.448       |       |
|                            |           |           | Overpelt     | DO016     | 8.896       |       |

| Study                      | Region    | Site Type | Sites             | Sub-sites | SEM Cu ug/g | Means |
|----------------------------|-----------|-----------|-------------------|-----------|-------------|-------|
| EU Copper Institute (2008) | N Belgium | Unknown   | Peer              | DO017     | 5.719       |       |
|                            |           |           | Peer              | DO018     | 1.906       |       |
|                            |           |           | Peer              | DO019     | 3.177       |       |
|                            |           |           | Peer              | DO020     | 3.177       |       |
|                            |           |           | Peer              | DO021     | 8.261       |       |
|                            |           |           | Peer              | DO022     | 3.177       |       |
|                            |           |           | Peer              | DO024     | 3.813       |       |
|                            |           |           | Peer              | DO025     | 6.355       |       |
|                            |           |           | Peer              | DO026     | 3.813       |       |
|                            |           |           | Peer              | DO027     | 0.635       |       |
|                            |           |           | Roesbrugge        | REFYR     | 17.79       |       |
|                            |           |           | Roesbrugge        | YZ001     | 12.07       |       |
|                            |           |           | Vleteren          | YZ004     | 5.084       |       |
|                            |           |           | Aalst             | 499900    | 6.355       |       |
|                            |           |           | Aalst             | 500900    | 3.813       |       |
|                            |           |           | Aalst             | 503500    | 5.084       |       |
|                            |           |           | Aalter            | 776900    | 12.07       |       |
|                            |           |           | Alveringem        | 679028    | 4.448       |       |
|                            |           |           | Antwerpen         | 182590    | 9.532       |       |
|                            |           |           | Arendonk          | 305500    | 5.084       |       |
|                            |           |           | Avelgem           | 178100    | 5.719       |       |
|                            |           |           | Avelgem           | 666000    | 16.52       |       |
|                            |           |           | Beerse            | 842000    | 31.14       |       |
|                            |           |           | Beersel           | 366620    | 1.271       |       |
|                            |           |           | Bekkevoort        | 417500    | 10.17       |       |
|                            |           |           | Beringen          | 420200    | 11.44       |       |
|                            |           |           | Beringen          | 422550    | 6.990       |       |
|                            |           |           | Berlare           | 167000    | 3.813       |       |
|                            |           |           | Bocholt           | 107600    | 1.906       |       |
|                            |           |           | Bocholt           | 848750    | 6.355       |       |
|                            |           |           | Bonheiden         | 372500    | 5.084       |       |
|                            |           |           | Boortmeerbeek     | 802000    | 1.906       |       |
|                            |           |           | Brecht            | 68000     | 2.542       |       |
|                            |           |           | Damme             | 27000     | 5.719       |       |
|                            |           |           | Damme             | 705500    | 5.719       |       |
|                            |           |           | Deerlijk          | 631900    | 0.635       |       |
|                            |           |           | Denderleeuw       | 505300    | 11.44       |       |
|                            |           |           | Dendermonde       | 164000    | 10.80       |       |
|                            |           |           | Dendermonde       | 499500    | 4.448       |       |
|                            |           |           | Dessel            | 848200    | 8.896       |       |
|                            |           |           | Desteldonk (Gent) | 38000     | 2.542       |       |
|                            |           |           | Diest             | 414400    | 23.51       |       |
|                            |           |           | Diksmuide         | 917850    | 0.000       |       |

| Study                      | Region    | Site Type | Sites               | Sub-sites | SEM Cu ug/g | Means |
|----------------------------|-----------|-----------|---------------------|-----------|-------------|-------|
| EU Copper Institute (2008) | N Belgium | Unknown   | Diksmuide           | 933000    | 1.271       |       |
|                            |           |           | Doornzele           | 33100     | 0.000       |       |
|                            |           |           | Essen               | 63000     | 1.906       |       |
|                            |           |           | Evergem (Gent)      | 34700     | 1.271       |       |
|                            |           |           | geer Kanne          | 144000    | 19.70       |       |
|                            |           |           | Gent                | 34610     | 0.635       |       |
|                            |           |           | Gent                | 170500    | 2.542       |       |
|                            |           |           | Gent                | 172100    | 3.177       |       |
|                            |           |           | Gent                | 780000    | 1.906       |       |
|                            |           |           | Gent (Langerbrugge) | 34100     | 4.448       |       |
|                            |           |           | Geraardsbergen      | 508000    | 18.43       |       |
|                            |           |           | Geraardsbergen      | 509000    | 9.532       |       |
|                            |           |           | Geraardsbergen      | 509500    | 11.44       |       |
|                            |           |           | Geraardsbergen      | 511000    | 8.896       |       |
|                            |           |           | Haacht              | 801000    | 6.355       |       |
|                            |           |           | Hamme               | 492000    | 19.70       |       |
|                            |           |           | Heist-Op-Den-Berg   | 318000    | 1.906       |       |
|                            |           |           | Hemiksem            | 162000    | 11.44       |       |
|                            |           |           | Herentals           | 845000    | 61.64       |       |
|                            |           |           | Herk-de-Stad        | 449800    | 5.084       |       |
|                            |           |           | Huizingen           | 366050    | 1.271       |       |
|                            |           |           | Hulsthout           | 255000    | 1.271       |       |
|                            |           |           | Humbeek             | 352500    | 1.906       |       |
|                            |           |           | Izegem              | 619000    | 10.17       |       |
|                            |           |           | Jabbeke             | 871090    | 3.177       |       |
|                            |           |           | Kinrooi             | 112000    | 8.261       |       |
|                            |           |           | Kluisbergen         | 177100    | 4.448       |       |
|                            |           |           | Knokke-Heist        | 28000     | 8.896       |       |
|                            |           |           | Koksijde            | 681000    | 1.271       |       |
|                            |           |           | Kortemark           | 921000    | 6.990       |       |
|                            |           |           | Kortenaken          | 425000    | 5.084       |       |
|                            |           |           | Kortrijk            | 579000    | 10.17       |       |
|                            |           |           | Kosijde             | 680010    | 3.177       |       |
|                            |           |           | Lanaken             | 141200    | 5.719       |       |
|                            |           |           | Lanaken             | 856000    | 33.04       |       |
|                            |           |           | Langmark            | 967000    | 10.17       |       |
|                            |           |           | Lembeek             | 355500    | 14.62       |       |
|                            |           |           | Leuven              | 220000    | 3.177       |       |
|                            |           |           | Leuven              | 803000    | 8.896       |       |
|                            |           |           | Liedekerke          | 527900    | 22.88       |       |
|                            |           |           | Lommel              | 848300    | 5.084       |       |
|                            |           |           | Londerzeel          | 228900    | 12.07       |       |
|                            |           |           | Loppem              | 893010    | 5.719       |       |



| Study                      | Region    | Site Type | Sites                 | Sub-sites | SEM Cu ug/g | Means |
|----------------------------|-----------|-----------|-----------------------|-----------|-------------|-------|
| EU Copper Institute (2008) | N Belgium | Unknown   | Lummen                | 454000    | 4.448       |       |
|                            |           |           | Maaseik               | 852500    | 6.990       |       |
|                            |           |           | Maldegem              | 766300    | 9.532       |       |
|                            |           |           | Mechelen              | 211900    | 10.80       |       |
|                            |           |           | Mechelen              | 250000    | 20.33       |       |
|                            |           |           | Mechelen              | 341000    | 0.000       |       |
|                            |           |           | Mechelen              | 800000    | 8.896       |       |
|                            |           |           | Mechelen (Muizen)     | 212400    | 10.80       |       |
|                            |           |           | Meerhout              | 335100    | 1.271       |       |
|                            |           |           | Meeuwen-Gruitrode     | 130250    | 52.11       |       |
|                            |           |           | Meeuwen-Gruitrode     | 133100    | 6.990       |       |
|                            |           |           | Melle                 | 168900    | 8.261       |       |
|                            |           |           | Merksplas             | 74200     | 2.542       |       |
|                            |           |           | Mesch                 | 147000    | 8.896       |       |
|                            |           |           | Mesen                 | 672054    | 12.07       |       |
|                            |           |           | Mesen                 | 949050    | 8.896       |       |
|                            |           |           | Moerbeke              | 39500     | 1.271       |       |
|                            |           |           | Mol                   | 87800     | 3.177       |       |
|                            |           |           | Mol                   | 304700    | 1.906       |       |
|                            |           |           | Mol                   | 842600    | 3.177       |       |
|                            |           |           | Niel                  | 210000    | 10.17       |       |
|                            |           |           | Nieuwpoort            | 856500    | 1.271       |       |
|                            |           |           | Nijlen                | 315400    | 4.448       |       |
|                            |           |           | Ninove                | 528940    | 9.532       |       |
|                            |           |           | Okegem                | 527955    | 6.355       |       |
|                            |           |           | Oudenaarde            | 174000    | 1.906       |       |
|                            |           |           | Oud-Turnhout          | 306200    | 3.813       |       |
|                            |           |           | Pecq                  | 179000    | 28.60       |       |
|                            |           |           | Poperinge             | 916000    | 20.33       |       |
|                            |           |           | Poperinge             | 979400    | 10.80       |       |
|                            |           |           | Poperinge             | 979700    | 27.32       |       |
|                            |           |           | Poperinge             | 990040    | 41.30       |       |
|                            |           |           | Retie                 | 307400    | 3.177       |       |
|                            |           |           | Rotselaar             | 386000    | 0.000       |       |
|                            |           |           | Scherpenheuvel-zichem | 410600    | 40.67       |       |
|                            |           |           | Schoten               | 840000    | 24.78       |       |
|                            |           |           | Sint-Gillis-Waas      | 192200    | 6.355       |       |
|                            |           |           | Slenaken              | 153000    | 1.906       |       |
|                            |           |           | St Martens Latem      | 572000    | 0.635       |       |
|                            |           |           | Stade                 | 924800    | 0.635       |       |
|                            |           |           | St-Pieters-Leeuw      | 347000    | 45.75       |       |
|                            |           |           | St-Pieters-Leeuw      | 355000    | 17.16       |       |
|                            |           |           | Temse                 | 162800    | 4.448       |       |

| Study                      | Region              | Site Type | Sites           | Sub-sites | SEM Cu ug/g | Means |
|----------------------------|---------------------|-----------|-----------------|-----------|-------------|-------|
| EU Copper Institute (2008) | N Belgium           | Unknown   | Terlanen        | 488000    | 3.177       | 3.05  |
|                            |                     |           | Tielt           | 598200    | 10.80       |       |
|                            |                     |           | Tielt           | 598300    | 8.896       |       |
|                            |                     |           | Tielt           | 598870    | 13.34       |       |
|                            |                     |           | Tongeren        | 145000    | 10.17       |       |
|                            |                     |           | Torhout         | 930000    | 2.542       |       |
|                            |                     |           | Torhout         | 932000    | 5.719       |       |
|                            |                     |           | Turnhout        | 292450    | 6.355       |       |
|                            |                     |           | Vilvoorde       | 354000    | 6.990       |       |
|                            |                     |           | Voeren          | 148700    | 5.084       |       |
|                            |                     |           | Voeren          | 149100    | 8.261       |       |
|                            |                     |           | Vorselaar       | 281000    | 1.271       |       |
|                            |                     |           | Vorselaar       | 289000    | 62.28       |       |
|                            |                     |           | Vosselaar       | 298000    | 27.32       |       |
|                            |                     |           | Welle           | 522000    | 8.896       |       |
|                            |                     |           | Wervik/Menen    | 665000    | 10.80       |       |
|                            |                     |           | Westerlo        | 319410    | 10.17       |       |
|                            |                     |           | Wevelgem        | 651400    | 6.355       |       |
|                            |                     |           | Wevelgem        | 905300    | 2.542       |       |
|                            |                     |           | Wingene         | 904000    | 4.448       |       |
|                            |                     |           | Wingene         | 905500    | 9.532       |       |
|                            |                     |           | Wuustwezel      | 70000     | 1.271       |       |
|                            |                     |           | Zeebrugge       | 877800    | 6.990       |       |
|                            |                     |           | Zeke            | 165000    | 11.44       |       |
|                            |                     |           | Zelzate         | 30000     | 9.532       |       |
|                            |                     |           | Zemst (Eppegem) | 344500    | 49.57       |       |
|                            |                     |           | Zemst (Eppegem) | 357900    | 0.000       |       |
|                            |                     |           | Zingem          | 173000    | 10.80       |       |
|                            |                     |           | Zonnebeke       | 960510    | 10.80       |       |
|                            |                     |           | Zwevegem        | 632800    | 10.80       |       |
|                            |                     |           | Zwevegem        | 659000    | 14.62       |       |
|                            |                     |           | na              | 510000    | 31.14       |       |
|                            |                     |           | na              | 684150    | 11.44       |       |
| Hall et al (2009)          | Antioch, California | Urban     | Kirker Creek    | KC8       | 0.191       | 3.05  |
|                            |                     |           |                 | KC1       | 0.191       |       |
|                            |                     |           |                 | KC10      | 0.191       |       |
|                            |                     |           |                 | KC12      | 0.191       |       |
|                            |                     |           |                 | KC2       | 0.191       |       |
|                            |                     |           |                 | KC3       | 0.191       |       |
|                            |                     |           |                 | KC4       | 0.191       |       |
|                            |                     |           |                 | KC9       | 0.191       |       |
|                            |                     |           |                 | KC7       | 0.191       |       |
|                            |                     |           |                 | KC4       | 1.462       |       |

| Study             | Region                 | Site Type     | Sites           | Sub-sites | SEM Cu ug/g | Means |
|-------------------|------------------------|---------------|-----------------|-----------|-------------|-------|
| Hall et al (2009) | Antioch, California    | Urban         | Kirker Creek    | KC6       | 1.462       | 4.21  |
|                   |                        |               |                 | KC5       | 1.652       |       |
|                   |                        |               |                 | KC1       | 2.097       |       |
|                   |                        |               |                 | KC12      | 2.860       |       |
|                   |                        |               |                 | KC6       | 3.451       |       |
|                   |                        |               |                 | KC11      | 4.130       |       |
|                   |                        |               |                 | KC10      | 4.321       |       |
|                   |                        |               |                 | KC7       | 4.957       |       |
|                   |                        | Agr           |                 | KC9       | 5.084       |       |
|                   |                        |               |                 | KC2       | 5.465       |       |
|                   |                        |               |                 | KC8       | 5.719       |       |
|                   |                        |               |                 | KC11      | 8.058       |       |
|                   |                        |               |                 | KC3       | 8.261       |       |
|                   |                        |               |                 | KC5       | 12.56       |       |
|                   |                        |               |                 | KC13      | 0.191       |       |
|                   |                        |               |                 | KC14      | 0.191       |       |
|                   |                        |               |                 | KC13      | 4.067       |       |
|                   |                        |               |                 | KC14      | 12.39       |       |
| Hall et al (2013) | Sacramento, California | Urban         | Arcade Creek    | ARC 1a    | 7.753       | 4.71  |
|                   |                        |               |                 | ARC 1     | 11.06       |       |
|                   |                        |               |                 | ARC 2     | 5.211       |       |
|                   |                        |               |                 | ARC 3     | 4.448       |       |
|                   |                        |               |                 | ARC 4     | 4.003       |       |
|                   |                        |               |                 | ARC 5     | 4.766       |       |
|                   |                        |               |                 | ARC 6     | 7.626       |       |
|                   |                        |               |                 | ARC 7     | 2.415       |       |
|                   |                        |               |                 | ARC 8     | 0.953       |       |
|                   |                        |               |                 | ARC 9     | 1.716       |       |
| Hall et al (2013) | Salinas, California    | Urban-Salinas | Salinas Streams | ARC 10    | 1.843       | 8.49  |
|                   |                        |               |                 | GAB 1     | 20.65       |       |
|                   |                        |               |                 | GAB 2     | 9.850       |       |
|                   |                        |               |                 | GAB 4     | 6.545       |       |
|                   |                        |               |                 | GAB 5     | 10.29       |       |
|                   |                        |               |                 | NAT 1     | 5.846       |       |
|                   |                        |               |                 | NAT 2     | 3.813       |       |
|                   |                        |               |                 | NAT 3     | 3.622       |       |
|                   |                        |               |                 | ALS 1     | 11.12       |       |
|                   |                        |               |                 | ALS 2     | 8.706       |       |
|                   |                        |               |                 | ALS 3     | 7.117       |       |
|                   |                        |               |                 | ALS 4     | 5.846       |       |
|                   |                        | Agr-Salinas   |                 | GAB 3     | 8.261       | 5.46  |
|                   |                        |               |                 | NAT 4     | 2.669       |       |
|                   |                        |               |                 |           |             |       |
| Hall et al (2015) | Rio Vista, California  | Agr           | Cache Slough    | CS-01     | 17.80       | 23.79 |

| Study             | Region                | Site Type | Sites        | Sub-sites | SEM Cu ug/g | Means |
|-------------------|-----------------------|-----------|--------------|-----------|-------------|-------|
| Hall et al (2015) | Rio Vista, California | Agr       | Cache Slough | CS-01     | 18.40       |       |
|                   |                       |           |              | CS-01     | 21.70       |       |
|                   |                       |           |              | CS-01     | 22.30       |       |
|                   |                       |           |              | CS-01     | 28.00       |       |
|                   |                       |           |              | CS-01     | 28.60       |       |
|                   |                       |           |              | CS-02     | 13.30       |       |
|                   |                       |           |              | CS-02     | 17.20       |       |
|                   |                       |           |              | CS-02     | 19.60       |       |
|                   |                       |           |              | CS-02     | 22.20       |       |
|                   |                       |           |              | CS-02     | 22.90       |       |
|                   |                       |           |              | CS-02     | 26.10       |       |
|                   |                       |           |              | CS-03     | 15.90       |       |
|                   |                       |           |              | CS-03     | 15.90       |       |
|                   |                       |           |              | CS-03     | 18.40       |       |
|                   |                       |           |              | CS-03     | 19.10       |       |
|                   |                       |           |              | CS-03     | 20.80       |       |
|                   |                       |           |              | CS-03     | 24.10       |       |
|                   |                       |           |              | CS-04     | 16.90       |       |
|                   |                       |           |              | CS-04     | 17.80       |       |
|                   |                       |           |              | CS-04     | 22.20       |       |
|                   |                       |           |              | CS-04     | 23.50       |       |
|                   |                       |           |              | CS-04     | 28.60       |       |
|                   |                       |           |              | CS-04     | 32.40       |       |
|                   |                       |           |              | CS-05     | 20.30       |       |
|                   |                       |           |              | CS-05     | 24.10       |       |
|                   |                       |           |              | CS-05     | 25.20       |       |
|                   |                       |           |              | CS-05     | 26.70       |       |
|                   |                       |           |              | CS-05     | 34.10       |       |
|                   |                       |           |              | CS-05     | 34.30       |       |
|                   |                       |           |              | CS-06     | 27.60       |       |
|                   |                       |           |              | CS-06     | 28.00       |       |
|                   |                       |           |              | CS-06     | 29.90       |       |
|                   |                       |           |              | CS-06     | 32.40       |       |
|                   |                       |           |              | CS-06     | 34.30       |       |
|                   |                       |           |              | CS-06     | 38.80       |       |
|                   |                       |           |              | CS-07     | 24.70       |       |
|                   |                       |           |              | CS-07     | 25.40       |       |
|                   |                       |           |              | CS-07     | 27.30       |       |
|                   |                       |           |              | CS-07     | 29.20       |       |
|                   |                       |           |              | CS-07     | 34.20       |       |
|                   |                       |           |              | CS-07     | 59.10       |       |
|                   |                       |           |              | CS-08     | 8.90        |       |
|                   |                       |           |              | CS-08     | 9.50        |       |

| Study             | Region                | Site Type | Sites            | Sub-sites | SEM Cu ug/g | Means |
|-------------------|-----------------------|-----------|------------------|-----------|-------------|-------|
| Hall et al (2015) | Rio Vista, California | Agr       | Cache Slough     | CS-08     | 9.80        |       |
|                   |                       |           |                  | CS-08     | 25.20       |       |
|                   |                       |           |                  | CS-08     | 26.10       |       |
|                   |                       |           |                  | CS-08     | 46.40       |       |
|                   |                       |           |                  | CS-09     | 13.20       |       |
|                   |                       |           |                  | CS-09     | 20.30       |       |
|                   |                       |           |                  | CS-09     | 21.00       |       |
|                   |                       |           |                  | CS-09     | 23.60       |       |
|                   |                       |           |                  | CS-09     | 25.40       |       |
|                   |                       |           |                  | CS-09     | 31.10       |       |
|                   |                       |           |                  | CS-10     | 8.90        |       |
|                   |                       |           |                  | CS-10     | 11.40       |       |
|                   |                       |           |                  | CS-10     | 17.20       |       |
|                   |                       |           |                  | CS-10     | 17.30       |       |
|                   |                       |           |                  | CS-10     | 19.10       |       |
|                   |                       |           |                  | CS-10     | 26.20       |       |
|                   |                       |           |                  | CS-11     | 14.00       |       |
|                   |                       |           |                  | CS-11     | 14.00       |       |
|                   |                       |           |                  | CS-11     | 17.80       |       |
|                   |                       |           |                  | CS-11     | 21.60       |       |
|                   |                       |           |                  | CS-11     | 25.40       |       |
|                   |                       |           |                  | CS-11     | 27.90       |       |
|                   |                       |           |                  | CS-12     | 17.70       |       |
|                   |                       |           |                  | CS-12     | 24.10       |       |
|                   |                       |           |                  | CS-12     | 26.40       |       |
|                   |                       |           |                  | CS-12     | 29.90       |       |
|                   |                       |           |                  | CS-12     | 31.10       |       |
|                   |                       |           |                  | CS-12     | 33.00       |       |
| Hall et al (2017) | N Illinois            | Agr       | Big Bureau Creek | BC 1      | 5.084       | 4.63  |
|                   |                       |           |                  | BC 1      | 3.813       |       |
|                   |                       |           |                  | BC 1      | 5.020       |       |
|                   |                       |           |                  | BC 2      | 4.448       |       |
|                   |                       |           |                  | BC 2      | 3.177       |       |
|                   |                       |           |                  | BC 2      | 4.575       |       |
|                   |                       |           |                  | BC 3      | 4.448       |       |
|                   |                       |           |                  | BC 3      | 3.177       |       |
|                   |                       |           |                  | BC 3      | 4.067       |       |
|                   |                       |           |                  | BC 4      | 5.719       |       |
|                   |                       |           |                  | BC 4      | 5.084       |       |
|                   |                       |           |                  | BC 4      | 4.575       |       |
|                   |                       |           |                  | BC 5      | 5.719       |       |
|                   |                       |           |                  | BC 5      | 5.084       |       |
|                   |                       |           |                  | BC 5      | 5.846       |       |

| Study             | Region                     | Site Type | Sites                | Sub-sites | SEM Cu ug/g | Means |
|-------------------|----------------------------|-----------|----------------------|-----------|-------------|-------|
| Hall et al (2017) | N Illinois                 | Agr       | Big Bureau Creek     | BC 6      | 4.448       |       |
|                   |                            |           |                      | BC 6      | 3.813       |       |
|                   |                            |           |                      | BC 6      | 4.766       |       |
|                   |                            |           |                      | BC 7      | 4.448       |       |
|                   |                            |           |                      | BC 7      | 3.813       |       |
|                   |                            |           |                      | BC 7      | 5.211       |       |
|                   |                            |           |                      | BC 8      | 6.355       |       |
|                   |                            |           |                      | BC 8      | 4.448       |       |
|                   |                            |           |                      | BC 8      | 4.130       |       |
|                   |                            |           |                      | BC 9      | 6.355       |       |
|                   |                            |           |                      | BC 9      | 3.177       |       |
|                   |                            |           |                      | BC 9      | 5.211       |       |
|                   |                            |           |                      | BC 10     | 4.448       |       |
|                   |                            |           |                      | BC 10     | 2.542       |       |
|                   |                            |           |                      | BC 10     | 3.495       |       |
|                   |                            |           |                      | BC 11     | 7.626       |       |
|                   |                            |           |                      | BC 11     | 4.448       |       |
|                   |                            |           |                      | BC 11     | 4.893       |       |
|                   |                            |           |                      | BC 12     | 5.084       |       |
|                   |                            |           |                      | BC 12     | 3.813       |       |
|                   |                            |           |                      | BC 12     | 4.385       |       |
| Hall et al (2018) | Santa Maria, California    | Agr       | Santa Maria          | SM 1      | 8.896       | 11.54 |
|                   |                            |           |                      | SM 2      | 10.17       |       |
|                   |                            |           |                      | SM 3      | 7.626       |       |
|                   |                            |           |                      | SM 4      | 8.896       |       |
|                   |                            |           |                      | SM 5      | 8.896       |       |
|                   |                            |           |                      | SM 6      | 10.17       |       |
|                   |                            |           |                      | SM 7      | 13.34       |       |
|                   |                            |           |                      | SM 8      | 8.896       |       |
|                   |                            |           |                      | SM 9      | 12.07       |       |
|                   |                            |           |                      | SM 10     | 10.80       |       |
|                   |                            |           |                      | SM 11     | 20.33       |       |
|                   |                            |           |                      | SM 12     | 18.43       |       |
| Hall et al (2021) | Pleasant Grove, California | Urban-PGC | Pleasant Grove Creek | PGC9      | 0.508       | 21.48 |
|                   |                            |           |                      | PGC1      | 0.515       |       |
|                   |                            |           |                      | PGC1      | 0.635       |       |
|                   |                            |           |                      | PGC9      | 0.972       |       |
|                   |                            |           |                      | PGC10     | 1.271       |       |
|                   |                            |           |                      | PGC1      | 1.271       |       |
|                   |                            |           |                      | PGC2      | 1.379       |       |
|                   |                            |           |                      | PGC21     | 1.398       |       |
|                   |                            |           |                      | PGC10     | 1.652       |       |
|                   |                            |           |                      | PGC4      | 1.716       |       |

| Study             | Region                     | Site Type | Sites                | Sub-sites | SEM Cu ug/g | Means |
|-------------------|----------------------------|-----------|----------------------|-----------|-------------|-------|
| Hall et al (2021) | Pleasant Grove, California | Urban-PGC | Pleasant Grove Creek | PGC19     | 2.161       |       |
|                   |                            |           |                      | PGC2      | 2.224       |       |
|                   |                            |           |                      | PGC19     | 2.288       |       |
|                   |                            |           |                      | PGC16     | 2.319       |       |
|                   |                            |           |                      | PGC3      | 2.478       |       |
|                   |                            |           |                      | PGC9      | 2.478       |       |
|                   |                            |           |                      | PGC8      | 2.542       |       |
|                   |                            |           |                      | PGC9      | 2.542       |       |
|                   |                            |           |                      | PGC8      | 2.586       |       |
|                   |                            |           |                      | PGC14     | 2.675       |       |
|                   |                            |           |                      | PGC9      | 2.732       |       |
|                   |                            |           |                      | PGC12     | 2.834       |       |
|                   |                            |           |                      | PGC3      | 3.012       |       |
|                   |                            |           |                      | PGC19     | 3.114       |       |
|                   |                            |           |                      | PGC19     | 3.177       |       |
|                   |                            |           |                      | PGC18     | 3.177       |       |
|                   |                            |           |                      | PGC2      | 3.177       |       |
|                   |                            |           |                      | PGC20     | 3.292       |       |
|                   |                            |           |                      | PGC1      | 3.304       |       |
|                   |                            |           |                      | PGC18     | 3.304       |       |
|                   |                            |           |                      | PGC19     | 3.368       |       |
|                   |                            |           |                      | PGC18     | 3.431       |       |
|                   |                            |           |                      | PGC20     | 3.749       |       |
|                   |                            |           |                      | PGC2      | 3.813       |       |
|                   |                            |           |                      | PGC1      | 3.813       |       |
|                   |                            |           |                      | PGC10     | 3.813       |       |
|                   |                            |           |                      | PGC12     | 3.813       |       |
|                   |                            |           |                      | PGC17     | 3.902       |       |
|                   |                            |           |                      | PGC16     | 4.003       |       |
|                   |                            |           |                      | PGC20     | 4.003       |       |
|                   |                            |           |                      | PGC14     | 4.003       |       |
|                   |                            |           |                      | PGC19     | 4.003       |       |
|                   |                            |           |                      | PGC2      | 4.067       |       |
|                   |                            |           |                      | PGC4      | 4.130       |       |
|                   |                            |           |                      | PGC10     | 4.448       |       |
|                   |                            |           |                      | PGC19     | 4.448       |       |
|                   |                            |           |                      | PGC10     | 4.550       |       |
|                   |                            |           |                      | PGC3      | 4.702       |       |
|                   |                            |           |                      | PGC9      | 5.084       |       |
|                   |                            |           |                      | PGC4      | 5.084       |       |
|                   |                            |           |                      | PGC10     | 5.401       |       |
|                   |                            |           |                      | PGC21     | 5.401       |       |
|                   |                            |           |                      | PGC15     | 5.592       |       |

| Study             | Region                     | Site Type | Sites                | Sub-sites | SEM Cu ug/g | Means |
|-------------------|----------------------------|-----------|----------------------|-----------|-------------|-------|
| Hall et al (2021) | Pleasant Grove, California | Urban-PGC | Pleasant Grove Creek | PGC4      | 5.630       |       |
|                   |                            |           |                      | PGC1      | 5.719       |       |
|                   |                            |           |                      | PGC12     | 5.719       |       |
|                   |                            |           |                      | PGC15     | 5.719       |       |
|                   |                            |           |                      | PGC4      | 5.719       |       |
|                   |                            |           |                      | PGC20     | 5.719       |       |
|                   |                            |           |                      | PGC11     | 5.795       |       |
|                   |                            |           |                      | PGC14     | 5.910       |       |
|                   |                            |           |                      | PGC4      | 5.973       |       |
|                   |                            |           |                      | PGC12     | 6.100       |       |
|                   |                            |           |                      | PGC22     | 6.100       |       |
|                   |                            |           |                      | PGC15     | 6.132       |       |
|                   |                            |           |                      | PGC11     | 6.164       |       |
|                   |                            |           |                      | PGC20     | 6.164       |       |
|                   |                            |           |                      | PGC2      | 6.228       |       |
|                   |                            |           |                      | PGC11     | 6.355       |       |
|                   |                            |           |                      | PGC17     | 6.545       |       |
|                   |                            |           |                      | PGC3      | 6.736       |       |
|                   |                            |           |                      | PGC18     | 6.806       |       |
|                   |                            |           |                      | PGC3      | 6.990       |       |
|                   |                            |           |                      | PGC18     | 6.990       |       |
|                   |                            |           |                      | PGC12     | 6.990       |       |
|                   |                            |           |                      | PGC9      | 7.346       |       |
|                   |                            |           |                      | PGC9      | 7.435       |       |
|                   |                            |           |                      | PGC9      | 7.626       |       |
|                   |                            |           |                      | PGC2      | 7.626       |       |
|                   |                            |           |                      | PGC1      | 7.626       |       |
|                   |                            |           |                      | PGC19     | 7.664       |       |
|                   |                            |           |                      | PGC10     | 7.880       |       |
|                   |                            |           |                      | PGC12     | 8.261       |       |
|                   |                            |           |                      | PGC4      | 8.363       |       |
|                   |                            |           |                      | PGC8      | 8.642       |       |
|                   |                            |           |                      | PGC18     | 8.769       |       |
|                   |                            |           |                      | PGC3      | 8.896       |       |
|                   |                            |           |                      | PGC8      | 9.087       |       |
|                   |                            |           |                      | PGC9      | 9.087       |       |
|                   |                            |           |                      | PGC10     | 9.475       |       |
|                   |                            |           |                      | PGC8      | 9.532       |       |
|                   |                            |           |                      | PGC21     | 9.532       |       |
|                   |                            |           |                      | PGC14     | 10.17       |       |
|                   |                            |           |                      | PGC10     | 10.23       |       |
|                   |                            |           |                      | PGC15     | 10.42       |       |
|                   |                            |           |                      | PGC4      | 10.42       |       |



| Study             | Region                     | Site Type | Sites                | Sub-sites | SEM Cu ug/g | Means |
|-------------------|----------------------------|-----------|----------------------|-----------|-------------|-------|
| Hall et al (2021) | Pleasant Grove, California | Urban-PGC | Pleasant Grove Creek | PGC8      | 10.42       |       |
|                   |                            |           |                      | PGC22     | 10.80       |       |
|                   |                            |           |                      | PGC16     | 10.80       |       |
|                   |                            |           |                      | PGC20     | 10.80       |       |
|                   |                            |           |                      | PGC15     | 10.87       |       |
|                   |                            |           |                      | PGC1      | 11.37       |       |
|                   |                            |           |                      | PGC19     | 11.44       |       |
|                   |                            |           |                      | PGC19     | 11.50       |       |
|                   |                            |           |                      | PGC14     | 12.07       |       |
|                   |                            |           |                      | PGC3      | 12.07       |       |
|                   |                            |           |                      | PGC3      | 13.28       |       |
|                   |                            |           |                      | PGC14     | 13.34       |       |
|                   |                            |           |                      | PGC18     | 13.47       |       |
|                   |                            |           |                      | PGC20     | 13.98       |       |
|                   |                            |           |                      | PGC12     | 13.98       |       |
|                   |                            |           |                      | PGC1      | 14.11       |       |
|                   |                            |           |                      | PGC16     | 14.23       |       |
|                   |                            |           |                      | PGC20     | 14.45       |       |
|                   |                            |           |                      | PGC4      | 14.62       |       |
|                   |                            |           |                      | PGC21     | 15.30       |       |
|                   |                            |           |                      | PGC8      | 15.68       |       |
|                   |                            |           |                      | PGC2      | 15.76       |       |
|                   |                            |           |                      | PGC12     | 15.89       |       |
|                   |                            |           |                      | PGC11     | 15.89       |       |
|                   |                            |           |                      | PGC3      | 16.35       |       |
|                   |                            |           |                      | PGC4      | 16.52       |       |
|                   |                            |           |                      | PGC11     | 16.90       |       |
|                   |                            |           |                      | PGC20     | 17.09       |       |
|                   |                            |           |                      | PGC2      | 17.16       |       |
|                   |                            |           |                      | PGC15     | 17.73       |       |
|                   |                            |           |                      | PGC2      | 18.09       |       |
|                   |                            |           |                      | PGC20     | 18.17       |       |
|                   |                            |           |                      | PGC17     | 18.62       |       |
|                   |                            |           |                      | PGC8      | 19.06       |       |
|                   |                            |           |                      | PGC15     | 19.06       |       |
|                   |                            |           |                      | PGC16     | 19.06       |       |
|                   |                            |           |                      | PGC16     | 19.70       |       |
|                   |                            |           |                      | PGC21     | 19.70       |       |
|                   |                            |           |                      | PGC17     | 20.14       |       |
|                   |                            |           |                      | PGC3      | 20.65       |       |
|                   |                            |           |                      | PGC16     | 20.92       |       |
|                   |                            |           |                      | PGC17     | 20.97       |       |
|                   |                            |           |                      | PGC15     | 21.40       |       |

| Study             | Region                     | Site Type | Sites                | Sub-sites | SEM Cu ug/g | Means |
|-------------------|----------------------------|-----------|----------------------|-----------|-------------|-------|
| Hall et al (2021) | Pleasant Grove, California | Urban-PGC | Pleasant Grove Creek | PGC11     | 22.24       |       |
|                   |                            |           |                      | PGC15     | 22.50       |       |
|                   |                            |           |                      | PGC21     | 23.51       |       |
|                   |                            |           |                      | PGC11     | 23.51       |       |
|                   |                            |           |                      | PGC21     | 23.70       |       |
|                   |                            |           |                      | PGC14     | 24.27       |       |
|                   |                            |           |                      | PGC21     | 24.40       |       |
|                   |                            |           |                      | PGC1      | 25.10       |       |
|                   |                            |           |                      | PGC14     | 26.09       |       |
|                   |                            |           |                      | PGC12     | 26.87       |       |
|                   |                            |           |                      | PGC21     | 27.58       |       |
|                   |                            |           |                      | PGC17     | 27.96       |       |
|                   |                            |           |                      | PGC14     | 29.29       |       |
|                   |                            |           |                      | PGC16     | 29.68       |       |
|                   |                            |           |                      | PGC8      | 33.04       |       |
|                   |                            |           |                      | PGC18     | 33.30       |       |
|                   |                            |           |                      | PGC12     | 33.87       |       |
|                   |                            |           |                      | PGC15     | 45.75       |       |
|                   |                            |           |                      | PGC22     | 50.07       |       |
|                   |                            |           |                      | PGC14     | 50.84       |       |
|                   |                            |           |                      | PGC8      | 58.91       |       |
|                   |                            |           |                      | PGC18     | 61.00       |       |
|                   |                            |           |                      | PGC16     | 61.64       |       |
|                   |                            |           |                      | PGC18     | 63.42       |       |
|                   |                            |           |                      | PGC22     | 67.36       |       |
|                   |                            |           |                      | PGC11     | 68.95       |       |
|                   |                            |           |                      | PGC22     | 77.53       |       |
|                   |                            |           |                      | PGC17     | 83.88       |       |
|                   |                            |           |                      | PGC11     | 86.33       |       |
|                   |                            |           |                      | PGC17     | 96.02       |       |
|                   |                            |           |                      | PGC17     | 115.8       |       |
|                   |                            |           |                      | PGC22     | 120.1       |       |
|                   |                            |           |                      | PGC11     | 120.9       |       |
|                   |                            |           |                      | PGC17     | 127.5       |       |
|                   |                            |           |                      | PGC22     | 162.8       |       |
|                   |                            |           |                      | PGC22     | 200.4       |       |
|                   |                            |           |                      | PGC22     | 214.9       |       |
|                   |                            |           |                      | PGC22     | 251.7       |       |
|                   |                            | Agr-PGC   |                      | PGC7      | 0.191       | 6.94  |
|                   |                            |           |                      | PGC6      | 0.508       |       |
|                   |                            |           |                      | PGC5      | 0.635       |       |
|                   |                            |           |                      | PGC5      | 1.271       |       |
|                   |                            |           |                      | PGC6      | 2.224       |       |

| Study                         | Region                     | Site Type       | Sites                     | Sub-sites | SEM Cu ug/g | Means |
|-------------------------------|----------------------------|-----------------|---------------------------|-----------|-------------|-------|
| Hall et al (2021)             | Pleasant Grove, California | Agr-PGC         | Pleasant Grove Creek      | PGC5      | 2.415       |       |
|                               |                            |                 |                           | PGC7      | 2.415       |       |
|                               |                            |                 |                           | PGC5      | 2.669       |       |
|                               |                            |                 |                           | PGC7      | 2.860       |       |
|                               |                            |                 |                           | PGC6      | 3.597       |       |
|                               |                            |                 |                           | PGC6      | 3.813       |       |
|                               |                            |                 |                           | PGC6      | 3.940       |       |
|                               |                            |                 |                           | PGC5      | 4.988       |       |
|                               |                            |                 |                           | PGC7      | 5.211       |       |
|                               |                            |                 |                           | PGC6      | 5.656       |       |
|                               |                            |                 |                           | PGC7      | 5.719       |       |
|                               |                            |                 |                           | PGC5      | 6.355       |       |
|                               |                            |                 |                           | PGC6      | 7.626       |       |
|                               |                            |                 |                           | PGC5      | 8.261       |       |
|                               |                            |                 |                           | PGC6      | 8.261       |       |
|                               |                            |                 |                           | PGC7      | 8.261       |       |
|                               |                            |                 |                           | PGC7      | 8.261       |       |
|                               |                            |                 |                           | PGC6      | 10.49       |       |
|                               |                            |                 |                           | PGC5      | 10.99       |       |
|                               |                            |                 |                           | PGC6      | 11.08       |       |
|                               |                            |                 |                           | PGC5      | 12.79       |       |
|                               |                            |                 |                           | PGC7      | 13.79       |       |
|                               |                            |                 |                           | PGC7      | 15.45       |       |
|                               |                            |                 |                           | PGC5      | 16.71       |       |
|                               |                            |                 |                           | PGC7      | 21.86       |       |
| Mendez-Fernandez et al (2014) | N Belgium                  | Control-Spain   | Nete/Scheldt River Basins | CN        | 1.91        | 1.91  |
|                               |                            | Unknown-Belgium |                           | SN        | 0.64        | 56.13 |
|                               |                            |                 |                           | KN        | 145.52      |       |
|                               |                            |                 |                           | MN        | 22.24       |       |
| Nizoli & Silva (2012)         | SE Coast of Brazil         | Urban-forest    | Santos-Cubatao Estuary    | 24–30     | < 0.0127    | 8.649 |
|                               |                            |                 |                           | 40–50     | < 0.0127    |       |
|                               |                            |                 |                           | 9–12      | < 0.0127    |       |
|                               |                            |                 |                           | 24–30     | < 0.0127    |       |
|                               |                            |                 |                           | 40–50     | < 0.0127    |       |
|                               |                            |                 |                           | 9–12      | 0.019       |       |
|                               |                            |                 |                           | 30–40     | 0.025       |       |
|                               |                            |                 |                           | 12–18     | 0.038       |       |
|                               |                            |                 |                           | 18–24     | 0.038       |       |
|                               |                            |                 |                           | 50–60     | 0.038       |       |
|                               |                            |                 |                           | 30–40     | 0.051       |       |
|                               |                            |                 |                           | 50–60     | 0.064       |       |
|                               |                            |                 |                           | 6–9       | 0.076       |       |
|                               |                            |                 |                           | 12–18     | 0.083       |       |

| Study                     | Region             | Site Type    | Sites                   | Sub-sites                   | SEM Cu ug/g | Means |
|---------------------------|--------------------|--------------|-------------------------|-----------------------------|-------------|-------|
| Nizoli & Silva (2012)     | SE Coast of Brazil | Urban-forest | Santos-Cubatao Estuary  | 18–24                       | 0.121       |       |
|                           |                    |              |                         | 6–9                         | 0.210       |       |
|                           |                    |              |                         | 3–6                         | 0.521       |       |
|                           |                    |              |                         | 60–70                       | 0.597       |       |
|                           |                    |              |                         | 3–6                         | 0.731       |       |
|                           |                    |              |                         | 50–60                       | 0.820       |       |
|                           |                    |              |                         | 50–60                       | 1.074       |       |
|                           |                    |              |                         | 30–40                       | 1.207       |       |
|                           |                    |              |                         | 40–50                       | 1.328       |       |
|                           |                    |              |                         | 60–70                       | 1.417       |       |
|                           |                    |              |                         | 0–3                         | 1.627       |       |
|                           |                    |              |                         | 0–3                         | 2.491       |       |
|                           |                    |              |                         | 40–50                       | 3.152       |       |
|                           |                    |              |                         | 0–3                         | 3.527       |       |
|                           |                    |              |                         | 9–12                        | 4.766       |       |
|                           |                    |              |                         | 30–40                       | 6.011       |       |
|                           |                    |              |                         | 18–24                       | 6.177       |       |
|                           |                    |              |                         | 3–6                         | 7.327       |       |
|                           |                    |              |                         | 6–9                         | 7.606       |       |
|                           |                    |              |                         | 24–30                       | 7.861       |       |
|                           |                    |              |                         | 12–18                       | 8.229       |       |
|                           |                    |              |                         | 24–30                       | 8.947       |       |
|                           |                    |              |                         | 6–9                         | 10.422      |       |
|                           |                    |              |                         | 40–50                       | 11.394      |       |
|                           |                    |              |                         | 30–40                       | 13.726      |       |
|                           |                    |              |                         | 3–6                         | 14.622      |       |
|                           |                    |              |                         | 0–3                         | 17.952      |       |
|                           |                    |              |                         | 18–24                       | 20.455      |       |
|                           |                    |              |                         | 9–12                        | 21.072      |       |
|                           |                    |              |                         | 6–9                         | 22.050      |       |
|                           |                    |              |                         | 0–3                         | 22.228      |       |
|                           |                    |              |                         | 12–18                       | 24.554      |       |
|                           |                    |              |                         | 3–6                         | 25.984      |       |
|                           |                    |              |                         | 24–30                       | 30.642      |       |
|                           |                    |              |                         | 18–24                       | 32.142      |       |
|                           |                    |              |                         | 12–18                       | 45.620      |       |
|                           |                    |              |                         | 9–12                        | 52.006      |       |
| Patton & Crecelius (2001) | Washington State   | Desert       | Washington State Desert | 100-F Area Slough           | 5.46        | 8.63  |
|                           |                    |              |                         | Old Hanford Townsite Slough | 6.93        |       |
|                           |                    |              |                         | Richland Pumphouse          | 12.01       |       |
|                           |                    |              |                         | White Bluffs Slough         | 7.12        |       |
|                           |                    |              |                         | 100-F Area Slough           | 6.55        |       |
|                           |                    |              |                         | Old Hanford Townsite Slough | 5.27        |       |

| Study                     | Region            | Site Type | Sites                    | Sub-sites                    | SEM Cu ug/g              | Means |       |       |
|---------------------------|-------------------|-----------|--------------------------|------------------------------|--------------------------|-------|-------|-------|
| Patton & Crecelius (2001) | Washington State  | Desert    | Washington State Desert  | Richland Pumphouse           | 9.21                     | 17.67 |       |       |
|                           |                   |           |                          | White Bluffs Slough          | 12.58                    |       |       |       |
|                           |                   |           |                          | 100-F Area Slough            | 9.66                     |       |       |       |
|                           |                   |           |                          | Old Hanford Townsite Slough  | 9.66                     |       |       |       |
|                           |                   |           |                          | White Bluffs Slough          | 10.49                    |       |       |       |
|                           |                   |           |                          | 2/3 From Grant County Shore  | 15.63                    |       |       |       |
|                           |                   |           |                          | Near Grant County Shore      | 15.63                    |       |       |       |
|                           |                   |           |                          | Near Yakima County Shore     | 15.89                    |       |       |       |
|                           |                   |           |                          | 1/3 From Grant County Shore  | 10.36                    |       |       |       |
|                           |                   |           |                          | 2/3 From Grant County Shore  | 14.74                    |       |       |       |
|                           |                   |           |                          | Grant County Shore Near Dam  | 25.29                    |       |       |       |
|                           |                   |           |                          | Near Grant County Shore      | 10.87                    |       |       |       |
|                           |                   | Agr       |                          | Near Yakima County Shore     | 25.35                    | 15.93 |       |       |
|                           |                   |           |                          | Yakima County Shore Near Dam | 24.97                    |       |       |       |
|                           |                   |           |                          | 1/3 From Grant County Shore  | 4.38                     |       |       |       |
|                           |                   |           |                          | 2/3 From Grant County Shore  | 14.55                    |       |       |       |
|                           |                   |           |                          | Grant County Shore Near Dam  | 30.50                    |       |       |       |
|                           |                   |           |                          | Near Grant County Shore      | 12.96                    |       |       |       |
|                           |                   |           |                          | Near Yakima County Shore     | 16.33                    |       |       |       |
|                           |                   |           |                          | Yakima County Shore Near Dam | 27.52                    |       |       |       |
|                           |                   |           |                          | 1/3 From Oregon Shore        | 18.56                    |       |       |       |
|                           |                   |           |                          | 2/3 From Oregon Shore        | 18.87                    |       |       |       |
|                           |                   |           |                          | Near Oregon Shore            | 20.91                    |       |       |       |
|                           |                   |           |                          | Near Washington Shore        | 6.80                     |       |       |       |
|                           |                   |           |                          | 1/3 From Oregon Shore        | 19.06                    |       |       |       |
|                           |                   |           |                          | 2/3 From Oregon Shore        | 16.46                    |       |       |       |
|                           |                   |           |                          | Near Oregon Shore            | 19.13                    |       |       |       |
|                           |                   |           |                          | Near Washington Shore        | 10.04                    |       |       |       |
|                           |                   |           |                          | Oregon Shore Near Dam        | 16.20                    |       |       |       |
|                           |                   |           |                          | Washington Shore Near Dam    | 16.97                    |       |       |       |
|                           |                   |           |                          | 1/3 From Oregon Shore        | 18.17                    |       |       |       |
|                           |                   |           |                          | 2/3 From Oregon Shore        | 15.51                    |       |       |       |
|                           |                   |           |                          | Near Oregon Shore            | 15.63                    |       |       |       |
|                           |                   |           |                          | Near Washington Shore        | 9.53                     |       |       |       |
|                           |                   |           |                          | Oregon Shore Near Dam        | 16.78                    |       |       |       |
|                           |                   |           |                          | Washington Shore Near Dam    | 16.33                    |       |       |       |
|                           |                   |           |                          | Agr                          | Franklin County Shore    |       | 12.90 | 12.31 |
|                           |                   |           |                          |                              | Mid River                |       | 15.70 |       |
|                           |                   |           |                          |                              | Walla Walla County Shore |       | 15.12 |       |
|                           |                   |           |                          |                              | Franklin County Shore    |       | 4.64  |       |
|                           |                   | Mid River |                          |                              | 13.15                    |       |       |       |
| Walla Walla County Shore  | 12.33             |           |                          |                              |                          |       |       |       |
| Pignotti et al (2018)     | Ravenna, NE Italy | Agr       | Pialassa Piomboni Lagoon |                              | 0.32                     | 6.35  |       |       |
|                           |                   |           |                          |                              |                          |       |       |       |
|                           |                   |           |                          |                              |                          |       |       |       |

| Study                        | Region                | Site Type         | Sites                           | Sub-sites         | SEM Cu ug/g | Means |
|------------------------------|-----------------------|-------------------|---------------------------------|-------------------|-------------|-------|
| Pignotti et al (2018)        | Ravenna, NE Italy     | Agr               | Pialassa Piomboni Lagoon        |                   | 88.96       |       |
| Poot et al (2009)            | SE Netherlands        | Agr               | Beekloop (stream)               | Liskesbrug 1      | 76.26       | 53.22 |
|                              |                       |                   |                                 | Liskesbrug 2      | 60.37       |       |
|                              |                       |                   |                                 | Liskesbrug 3      | 57.19       |       |
|                              |                       |                   |                                 | Liskesbrug 4      | 19.06       |       |
| Prica et al (2008)           | N Serbia              | Agr               | Various rivers, canals, streams | Begej-1           | 69.90       | 45.42 |
|                              |                       |                   |                                 | Begej-1           | 96.59       |       |
|                              |                       |                   |                                 | Begej-2           | 45.12       |       |
|                              |                       |                   |                                 | Begej-2           | 54.65       |       |
|                              |                       |                   |                                 | Danube-2          | 62.28       |       |
|                              |                       |                   |                                 | Kudos             | 54.65       |       |
|                              |                       |                   |                                 | Kudos             | 54.65       |       |
|                              |                       |                   |                                 | Nadela            | 51.47       |       |
|                              |                       |                   |                                 | Nadela            | 70.54       |       |
|                              |                       |                   |                                 | Sava-Sabac        | 6.35        |       |
|                              |                       |                   |                                 | Sava-Sabac        | 6.35        |       |
|                              |                       |                   |                                 | Tamis-1           | 43.85       |       |
|                              |                       |                   |                                 | Tamis-1           | 43.85       |       |
|                              |                       |                   |                                 | Tamis-2           | 17.16       |       |
|                              |                       |                   |                                 | Tamis-2           | 36.22       |       |
|                              |                       |                   |                                 | Tisa-1            | 10.17       |       |
|                              |                       |                   |                                 | Tisa-1            | 48.29       |       |
|                              |                       | Urb               |                                 | Begej-3           | 12.71       | 17.58 |
|                              |                       |                   |                                 | Begej-3           | 12.71       |       |
|                              |                       |                   |                                 | Danube-1          | 23.51       |       |
|                              |                       |                   |                                 | Danube-1          | 23.51       |       |
|                              |                       |                   |                                 | DTD-Canal         | 16.52       |       |
|                              |                       |                   |                                 | DTD-Canal         | 16.52       |       |
| Remali et al (2018)          | SE Coast of Australia | Reference/Control | Lane Cove Estuary               | Reference/Control | 25.00       | 25.00 |
| Shyleshchandran et al (2018) | SW Coast of India     | Urb               | Vembanad Lake System            | Min               | 0.64        | 9.53  |
|                              |                       |                   |                                 | Max               | 35.59       |       |
| Simpson et al (1998)         | SE Coast of Australia | Control           | Cooks River Estuary             | Control           | 7.43        | 7.43  |
| Van Den Berg et al (1998)    | SW Netherlands        | Agr               | Meuse/Rhine River Delta         | A                 | 38.13       | 56.66 |
|                              |                       |                   |                                 | A                 | 57.19       |       |
|                              |                       |                   |                                 | B                 | 19.06       |       |
|                              |                       |                   |                                 | B                 | 69.90       |       |
|                              |                       |                   |                                 | C                 | 63.55       |       |
|                              |                       |                   |                                 | C                 | 76.26       |       |
|                              |                       |                   |                                 | D                 | 57.19       |       |
|                              |                       |                   |                                 | D                 | 69.90       |       |
|                              |                       |                   |                                 | A                 | 50.84       |       |
|                              |                       |                   |                                 | B                 | 38.13       |       |
|                              |                       |                   |                                 | C                 | 69.90       |       |

| Study                     | Region                | Site Type         | Sites                   | Sub-sites                | SEM Cu ug/g | Means |
|---------------------------|-----------------------|-------------------|-------------------------|--------------------------|-------------|-------|
| Van Den Berg et al (1998) | SW Netherlands        | Agr               | Meuse/Rhine River Delta | D                        | 69.90       |       |
| Van Den Berg et al (2001) | N Netherlands         | Agr               | Lake Ketel              | A                        | 37.49       | 35.28 |
|                           |                       |                   |                         |                          | 35.59       |       |
|                           |                       |                   |                         |                          | 34.95       |       |
|                           |                       |                   |                         |                          | 31.77       |       |
|                           |                       |                   |                         |                          | 31.14       |       |
|                           |                       |                   |                         |                          | 34.95       |       |
|                           |                       |                   |                         |                          | 30.50       |       |
|                           |                       |                   |                         |                          | 24.15       |       |
|                           |                       |                   |                         |                          | 19.06       |       |
|                           |                       |                   |                         |                          | 18.43       |       |
|                           |                       |                   |                         | B                        | 39.40       |       |
|                           |                       |                   |                         |                          | 32.41       |       |
|                           |                       |                   |                         |                          | 29.87       |       |
|                           |                       |                   |                         |                          | 26.69       |       |
|                           |                       |                   |                         |                          | 19.70       |       |
|                           |                       |                   |                         |                          | 16.52       |       |
|                           |                       |                   |                         |                          | 14.62       |       |
|                           |                       |                   |                         |                          | 17.79       |       |
|                           |                       |                   |                         |                          | 13.34       |       |
|                           |                       |                   |                         |                          | 23.51       |       |
|                           |                       |                   |                         | C                        | 58.46       |       |
|                           |                       |                   |                         |                          | 54.01       |       |
|                           |                       |                   |                         |                          | 50.20       |       |
|                           |                       |                   |                         |                          | 48.29       |       |
|                           |                       |                   |                         |                          | 51.47       |       |
|                           |                       |                   |                         |                          | 48.29       |       |
|                           |                       |                   |                         |                          | 48.29       |       |
|                           |                       |                   |                         |                          | 51.47       |       |
|                           |                       |                   |                         |                          | 47.66       |       |
|                           |                       |                   |                         |                          | 47.66       |       |
|                           |                       |                   |                         | D                        | 38.13       |       |
|                           |                       |                   |                         |                          | 36.22       |       |
|                           |                       |                   |                         |                          | 39.40       |       |
|                           |                       |                   |                         |                          | 40.67       |       |
|                           |                       |                   |                         |                          | 39.40       |       |
|                           |                       |                   |                         |                          | 36.86       |       |
|                           |                       |                   |                         |                          | 30.50       |       |
|                           |                       |                   |                         |                          | 33.68       |       |
|                           |                       |                   |                         |                          | 40.03       |       |
|                           |                       |                   |                         |                          | 38.76       |       |
| Van Den Hoop et al (1997) | Netherlands / Belgium | Coastal-reference | Netherlands / Belgium   | 11 Schouwen-Duiveland 1• | 1.27        | 1.27  |
|                           |                       |                   |                         | 12 Schouwen-Duiveland 4• | 0.64        |       |

| Study                     | Region                | Site Type         | Sites                    | Sub-sites                          | SEM Cu ug/g | Means |
|---------------------------|-----------------------|-------------------|--------------------------|------------------------------------|-------------|-------|
| Van Den Hoop et al (1997) | Netherlands / Belgium | Coastal-reference | Netherlands / Belgium    | 15 Ter Heijden 4•                  | 2.54        | 17.09 |
|                           |                       |                   |                          | 17 Terschelling 100•               | 1.27        |       |
|                           |                       |                   |                          | 18 Vlieland 70•                    | 1.27        |       |
|                           |                       |                   |                          | 19 Vlieland 4•                     | 0.64        |       |
|                           |                       |                   |                          | 20 Terschelling 70•                | 1.27        |       |
|                           |                       |                   |                          | 21 Ter Heijden 2•                  | 1.27        |       |
|                           |                       | Urban             |                          | 2 Botlek                           | 49.57       |       |
|                           |                       |                   |                          | 3 Appelzak                         | 2.54        |       |
|                           |                       |                   |                          | 4 Geul Zandvliet /Berendrechtsluis | 26.69       |       |
|                           |                       |                   |                          | 5 Geul Boudewijn v Cauwelaertsluis | 21.61       |       |
|                           |                       |                   |                          | 7 Nieuwersluis                     | 6.35        |       |
|                           |                       |                   |                          | 8 Geul Kallosluis                  | 33.68       |       |
|                           |                       | Agr               |                          | 10 Leeghwaterplas                  | 1.27        | 34.53 |
|                           |                       |                   |                          | 13 Drempel van Lillo               | 22.24       |       |
|                           |                       |                   |                          | 14 Drempel van Zandvliet           | 5.08        |       |
|                           |                       |                   |                          | 16 Sluissche Hompels               | 1.91        |       |
|                           |                       |                   |                          | 1 Schoonrewoerdse wiel             | 20.97       |       |
|                           |                       |                   |                          | 6 Oostvaarders Plassen             | 10.80       |       |
|                           |                       |                   |                          | 9 Ketelmeer                        | 71.81       |       |
| Wang et al (2019)         | SE Coast of China     | Urb-Indust        | Maluan Bay               | ML1                                | 75.13       | 68.94 |
|                           |                       |                   |                          | ML2                                | 54.45       |       |
|                           |                       |                   |                          | ML3                                | 122.99      |       |
|                           |                       |                   |                          | ML4                                | 52.14       |       |
|                           |                       |                   |                          | ML5                                | 59.99       |       |
|                           |                       |                   |                          | ML6                                | 19.97       |       |
|                           |                       |                   |                          | ML7                                | 20.02       |       |
|                           |                       |                   |                          | ML8                                | 146.85      |       |
| Yin et al (2008)          | NE Coast of China     | Urb               | Meiliang Bay & Wuli Lake | 0.00                               | 43.85       | 23.33 |
|                           |                       |                   |                          | 1.00                               | 29.87       |       |
|                           |                       |                   |                          | 3.00                               | 17.16       |       |
|                           |                       |                   |                          | 5.00                               | 9.53        |       |
|                           |                       |                   |                          | 32.00                              | 29.87       |       |
|                           |                       |                   |                          | 9.00                               | 13.98       |       |
|                           |                       |                   |                          | 15.00                              | 19.06       |       |
